# Supplementary material
Source: publisher figshare collection journal article supplement (https://sage.figshare.com/ndownloader/files/24449277)
Supplement: Supplementary file 1 [file 24449277]

clear all
	 set more off
	 pause on
	 
********************************* 

cd "~/Dropbox/Gender Conflict Experiment/JCR 2020 Materials/JCR replication"
use "Manekin_Wood_JCR_USAexperiment.dta"
	
*****************************************
* treatment assignment:
*****************************************
gen women=.
replace women=1 if fl_10_do=="Femalev1" 
replace women=0 if fl_10_do=="Malev1" 

lab define women 0 "men" 1 "women", modify
lab val women women
tab women

gen men=.
replace men=1 if women==0
replace men=0 if women==1
lab define men 0 "women" 1 "men", modify
lab val men men
tab men

*****************************************
* covariates:
*****************************************

* age
lab var q2 age
lab def age 1 "18-24" 2 "25-34" 3 "35-44" 4 "45-54" 5 "55-64" 6 "65-74" 7 "75-84" 8 "85 or older", modify
lab val q2 age
tab q2
tab q2, gen (age)

* gender 
tab q3
ren q3 female
recode female (1=0)(2=1)
lab def female 0 "Male" 1 "Female", modify
lab val female female   
lab var female female 
tab female

* education
tab q4
lab var q4 education
lab def education 1 "Less than high school" 2 "High school / GED" 3 "Some college" 4 "Associates's degree" 5 "Bachelor's degree" 6 "Graduate degree", modify
lab val q4 education
tab q4
tab q4, gen (education)

*race
tab q5
lab var q5 "Race"
lab define q5 1 "Asian/Asian-American" 2 "Black/African-American" 3 "Latino/Hispanic American" 4 "Native American" 5 "White/Caucasian" 6 "Multiracial" 7 "Other", modify 
lab val q5 q5
tab q5

recode q5 (5=4)(4 6 7 =5), gen (RACE)
move RACE q5
lab define RACE 1 "Asian/Asian-American" 2 "African-American" 3 "Latino" 4 "White" 5 "Other" , modify 
lab val RACE RACE
tab RACE, gen (race)

lab var race1 "Asian"
lab var race2 "Black"
lab var race3 "Latino"
lab var race4 "White"
lab var race5 "Other"

*birth country
tab q6
lab define q6 1 "United States" 2 "Other"
lab val q6 q6 
tab q6 
tab q6_2_text // 40 born outside U.S.

* how long in U.S. //median 19.5
su q7, de

* international news consumption
tab q8
lab define q8 1 "Rarely/never" 2 "Once or twice a week" 3 "A few times a week" 4 "Once or twice a day" 5 "More than twice a day", modify
lab val q8 q8 
tab q8 

* income
tab q9
lab define q9 1 "<30,000" 2 "30,000-59,999" 3 "60,000-89,999" 4 "90,000-119,999" 5 ">120,000", modify
lab val q9 q9
lab var q9 "income"
tab q9

* partisanship
tab q10
lab var q10 "partisanship"
lab define partisanship 1 "Republican" 2 "Democrat" 3 "Neither", modify 
lab val q10 partisanship
tab q10
tab q10, gen(partisan) 

* liberal
tab q11
lab define q11 1 "Extremely liberal" 2 "liberal" 3 "slightly liberal" 4 "moderate" 5 "slightly conservative" 6 "conservative" 7 "extremely conservative", modify
lab val q11 q11
tab q11

*reality check
tab q10 q11

* political interest
tab q12
recode q12 (1=5) (2=4) (4=2) (5=1), gen(q12b)
lab define q12b 1 "not at all interested" 2 "slightly interested" 3 "moderately interested" 4 "very interested" 5 "extremely interested", modify
lab val q12b q12b
tab q12b

* reality check 
tab q8 q12b


*****************************************
* manipulation/attention checks:
*****************************************

* do respondents get women/men

* q32
lab define q32 1 "female" 2 "male" 4 "don't know", modify
lab val q32 q32
tab q32 women, col // note - soft launch did not include this question, and replacements from Qualtrics were dropped if they got this wrong. N=625 here.

* ~85% of those exposed to men got it right. ~92% of those exposed to women got it right.


*****************************************
* DV labels
*****************************************

* interest
tab q18
recode q18 (1=5) (2=4) (4=2) (5=1), gen(q18b)
lab def likely 1 "extremely unlikely" 2 "somewhat unlikely" 3 "neither likely nor unlikely" 4 "somewhat likely" 5 "extremely likely", modify
lab val q18b likely
tab q18b

* goals legitimate
tab q19
recode q19 (1=5) (2=4) (4=2) (5=1), gen(q19b)
lab def goals 1 "strongly believe groups goals are not legitimate" 2 "tend to believe groups goals are not legitimate" 3 "not sure whether goals are legitimate or not" 4 "tend to believe groups goals are legitimate" 5 "strongly believe groups goals are legitimate", modify
lab val q19b goals
tab q19b


* tactics legitimate
tab q20
recode q20 (1=5) (2=4) (4=2) (5=1), gen(q20b)
lab def tactics 1 "strongly believe groups tactics are not legitimate" 2 "tend to believe groups tactics are not legitimate" 3 "not sure whether tactics are legitimate or not" 4 "tend to believe groups tactics are legitimate" 5 "strongly believe groups tactics are legitimate", modify
lab val q20b tactics
tab q20b


* motivations

* motivation1 - lost family members in war
gen motivation1 = q24_1
replace motivation1 = q25_1 if q24_1==.
recode motivation1 (1=5) (2=4) (4=2) (5=1)
lab val motivation1 likely
tab motivation1

* motivation2 - ideological committment 
gen motivation2=q24_2
replace motivation2 = q25_2 if q24_2==.
recode motivation2 (1=5) (2=4) (4=2) (5=1)
lab val motivation2 likely
tab motivation2

* motivation3 - desire for thrill and adventure 

gen motivation3=q24_3
replace motivation3 = q25_3 if q24_3==.
recode motivation3 (1=5) (2=4) (4=2) (5=1)
lab val motivation3 likely
tab motivation3

* motivation4 - opportunity to profit 

gen motivation4=q24_4
replace motivation4 = q25_4 if q24_4==.
recode motivation4 (1=5) (2=4) (4=2) (5=1)
lab val motivation4 likely
tab motivation4

******************************************************
* Online Appendix Section 2.1: Descriptive statistics:
******************************************************
su age1 age2 age3 age4 age5 age6 female race1 race2 race3 race4 education1 education2 education3 education4 education5 education6 


********************************************
* Online Appendix Section 3.1: Balance check
********************************************

global controls female q2 q4 race4 q9 q8 q12b partisan1 partisan2
su $controls

orth_out $controls, by (women) se compare test count

*****************************************
* Analysis: Table 1
*****************************************

* Interest in group

ttest q18b, by(men) une 

* Legitimacy of goals

ttest q19b, by(men) une

* Legitimacy of tactics

ttest q20b, by(men) une


*****************************************
* Analysis: Table 2	
*****************************************

* Ideological commitment 

ttest motivation2, by(men) une 

* thrill and adventure 

ttest motivation3, by(men) une 

* profit seeking 

ttest motivation4, by(men) une 

***********************************************************************
* Online Appendix Section 4: Heterogeneous Effects by Respondent Gender
***********************************************************************

*** Table 5

* Interest in group

ttest q18b if female==1, by(men) une
ttest q18b if female==0, by(men) une


* Legitimacy of goals

ttest q19b if female==1, by(men) une
ttest q19b if female==0, by(men) une

* Legitimacy of tactics

ttest q20b if female==1, by(men) une
ttest q20b if female==0, by(men) une

*** Table 6

* Ideological commitment 

ttest motivation2 if female==1, by(men) 
ttest motivation2 if female==0, by(men) 

* Thrill and adventure 

ttest motivation3 if female==1, by(men) 
ttest motivation3 if female==0, by(men) 

* Profit seeking

ttest motivation4 if female==1, by(men) 
ttest motivation4 if female==0, by(men) 


clear
